# Supplementary material for: Tau-Marin Mucoadhesive Gel for Prevention and Treatment of Gum Diseases
Source: MDPI journal article supplement (doi:10.3390/gels9080607), 2023-07-27
Supplement: s1 [file s1]

# Tau-Marin Mucoadhesive Gel for Prevention and Treatment of Gum Diseases

Giuseppe Giannini <sup>1,\*</sup>, Irene Ragusa <sup>2</sup>, Giulia Nerina Nardone <sup>2</sup>, Sara Soldi <sup>3</sup>, Marina Elli <sup>3</sup>, Piera Valenti <sup>4</sup> and Luigi Rosa <sup>4</sup>

<sup>1</sup> R&D Alfasigma S.p.A., Via Pontina, Km 30.400, 00071 Pomezia, Italy  
<sup>2</sup> Labomar S.p.a., Via F. Filzi, 33, 31036 Treviso, Italy; irene.ragusa@labomar.com (I.R.); giulianerina.nardone@labomar.com (G.N.N.)  
<sup>3</sup> AAT—Advanced Analytical Technologies Srl, Via P. Majavacca 12, 29017 Fiorenzuola d’Arda, Italy; sara.soldi@aat-taa.eu (S.S.); marina.elli@aat-taa.eu (M.E.)  
<sup>4</sup> Department of Public Health and Infectious Diseases, University of Rome La Sapienza, Piazzale A. Moro 5, 00185 Rome, Italy; piera.valenti@uniroma1.it (P.V.); luigi.rosa@uniroma1.it (L.R.)  
\* Correspondence: giuseppe.giannini@alfasigma.com

## Supporting Information

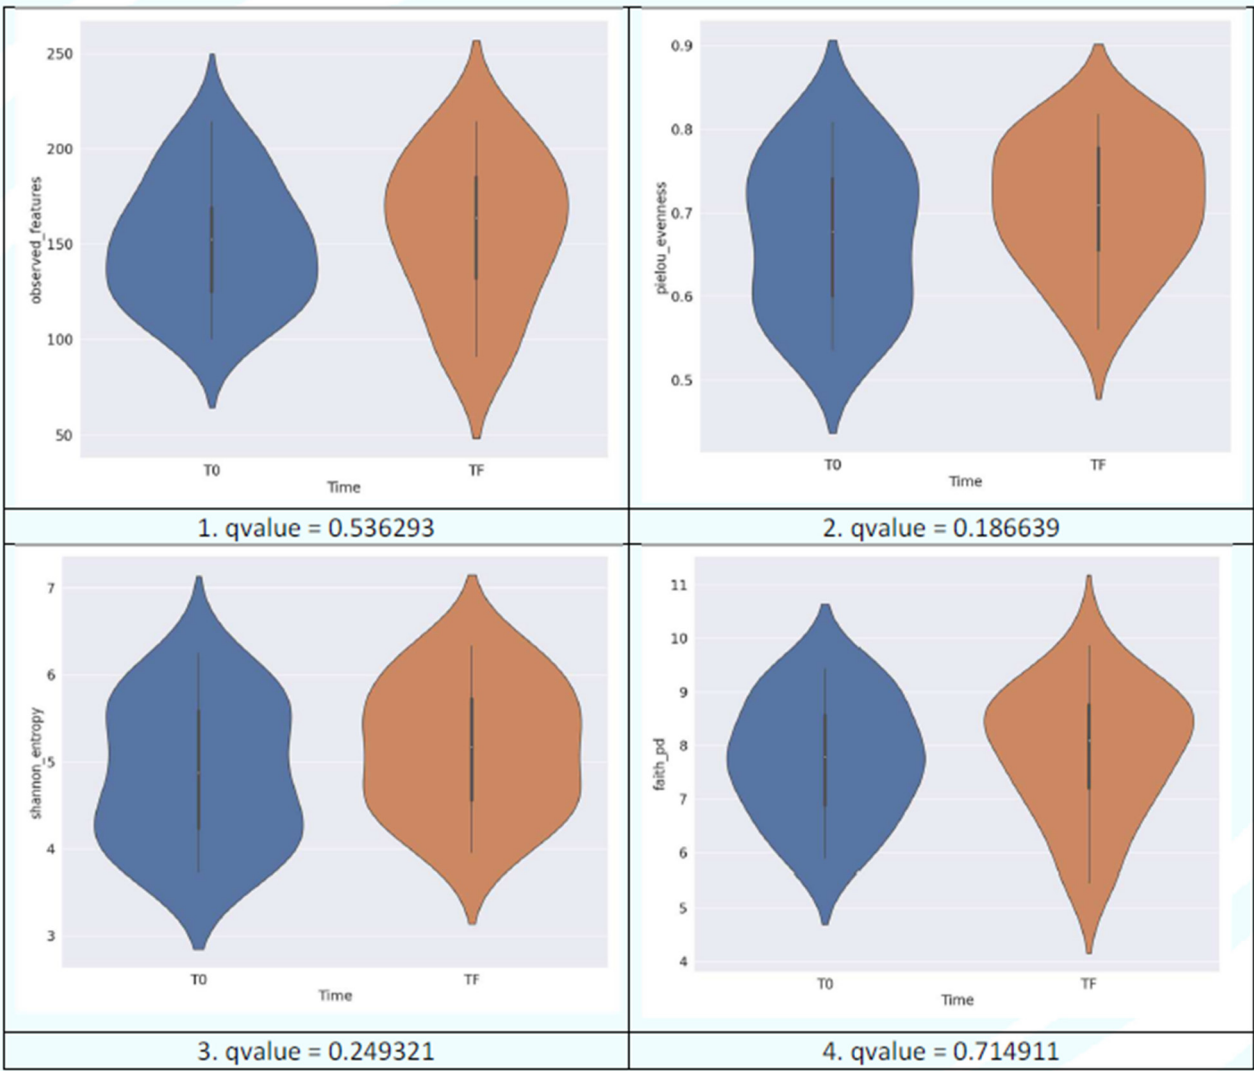

(A)

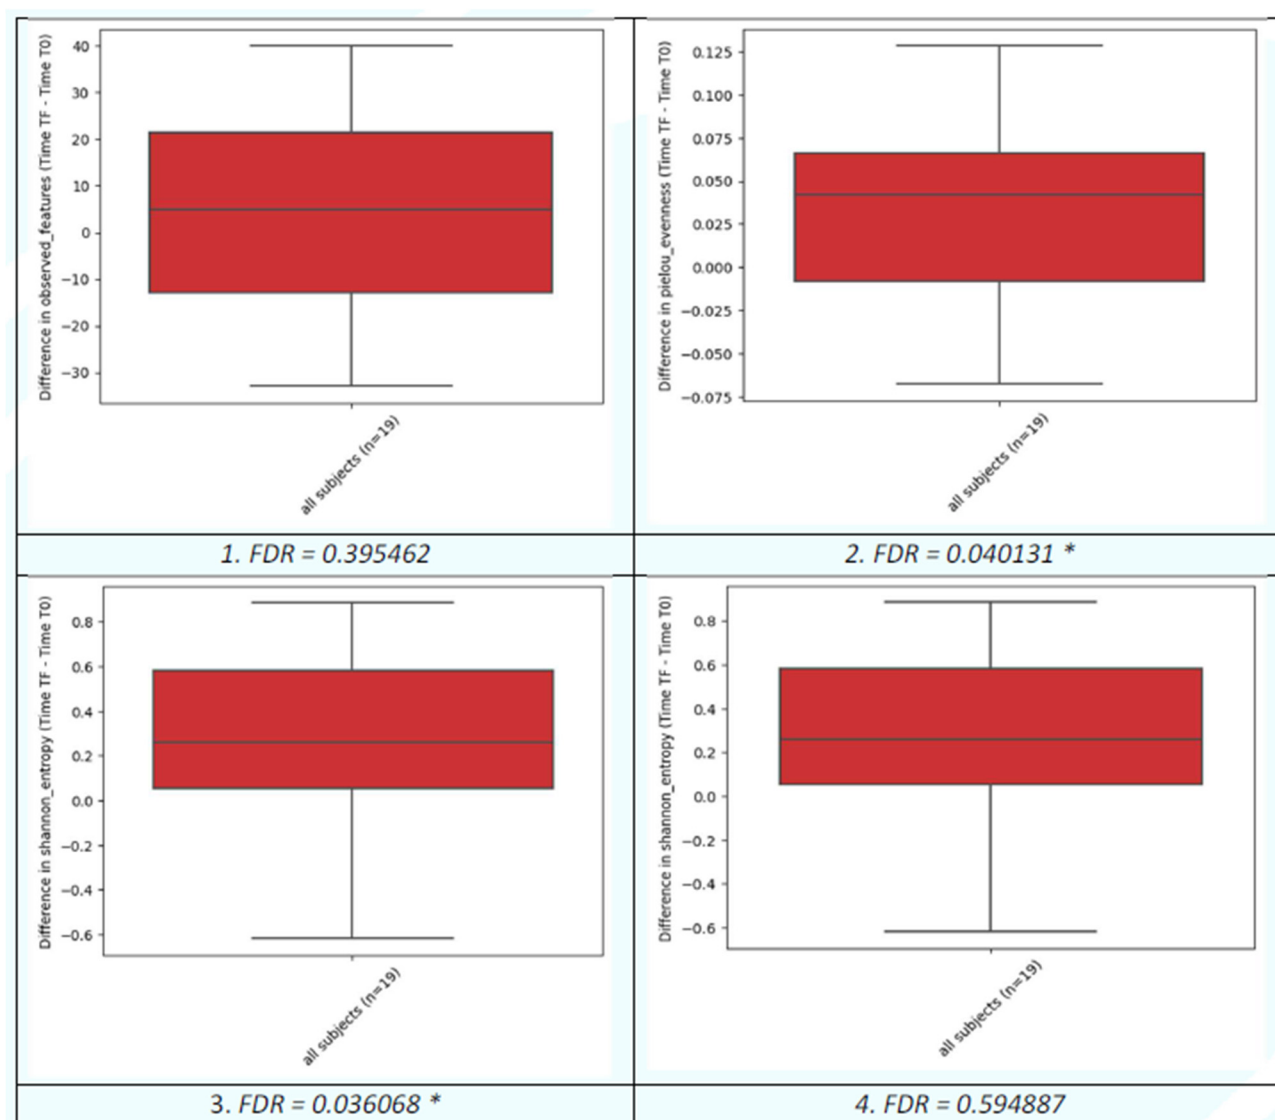

(B)

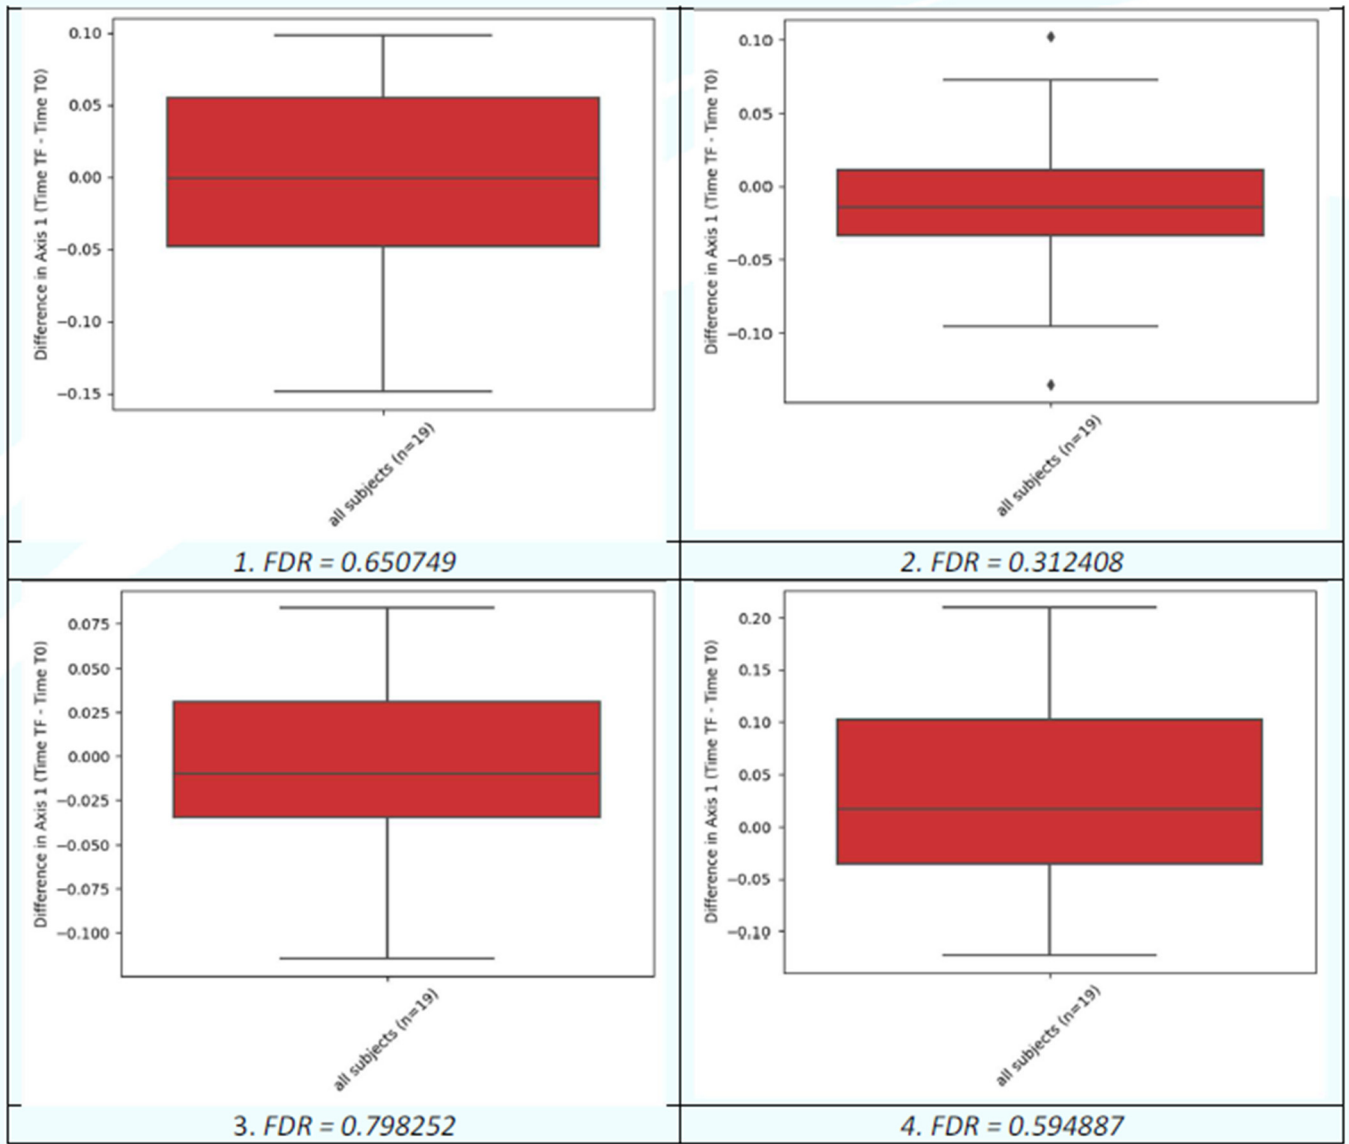

(C)

**Figure S1:** (A): Alpha diversity index distributions. Each violin plot shows a specific alpha diversity index distribution at the two time points (20 at T0 in blue, and 19 at TF in orange). The q-value of Kruskal Wallis test is indicated below the graph. (1) Observed features; (2) Pielou's evenness; (3) Shannon entropy; (4) Faith Phylogenetic Diversity. (B): Alpha diversity pairwise differences. Each boxplot shows the distribution of the differences of an alpha-diversity index between T0-TF within the same sample (pairwise difference). The FDR p-value of the Wilcoxon signed-rank test, used to determine if the mean of differences ranges from 0, is indicated below the graph. Sample S4 is excluded from the analysis, as not paired. (1) Observed features; (2) Pielou's evenness; (3) Shannon entropy; (4) Faith Phylogenetic Diversity. (C): Beta diversity pairwise differences. Each boxplot shows the distribution of the differences in the PCoA Axis1 of the beta-diversity metric between T0-TF within the same sample (pairwise difference). The FDR p-value of the Wilcoxon signed-rank test, used to determine if the mean of differences ranges from 0, is indicated below the graph. Sample S4 is excluded from the analysis, as not paired. (1) Bray Curtis; (2) Jaccard; (3) Unweighted Unifrac; (4) Weighted Unifrac.

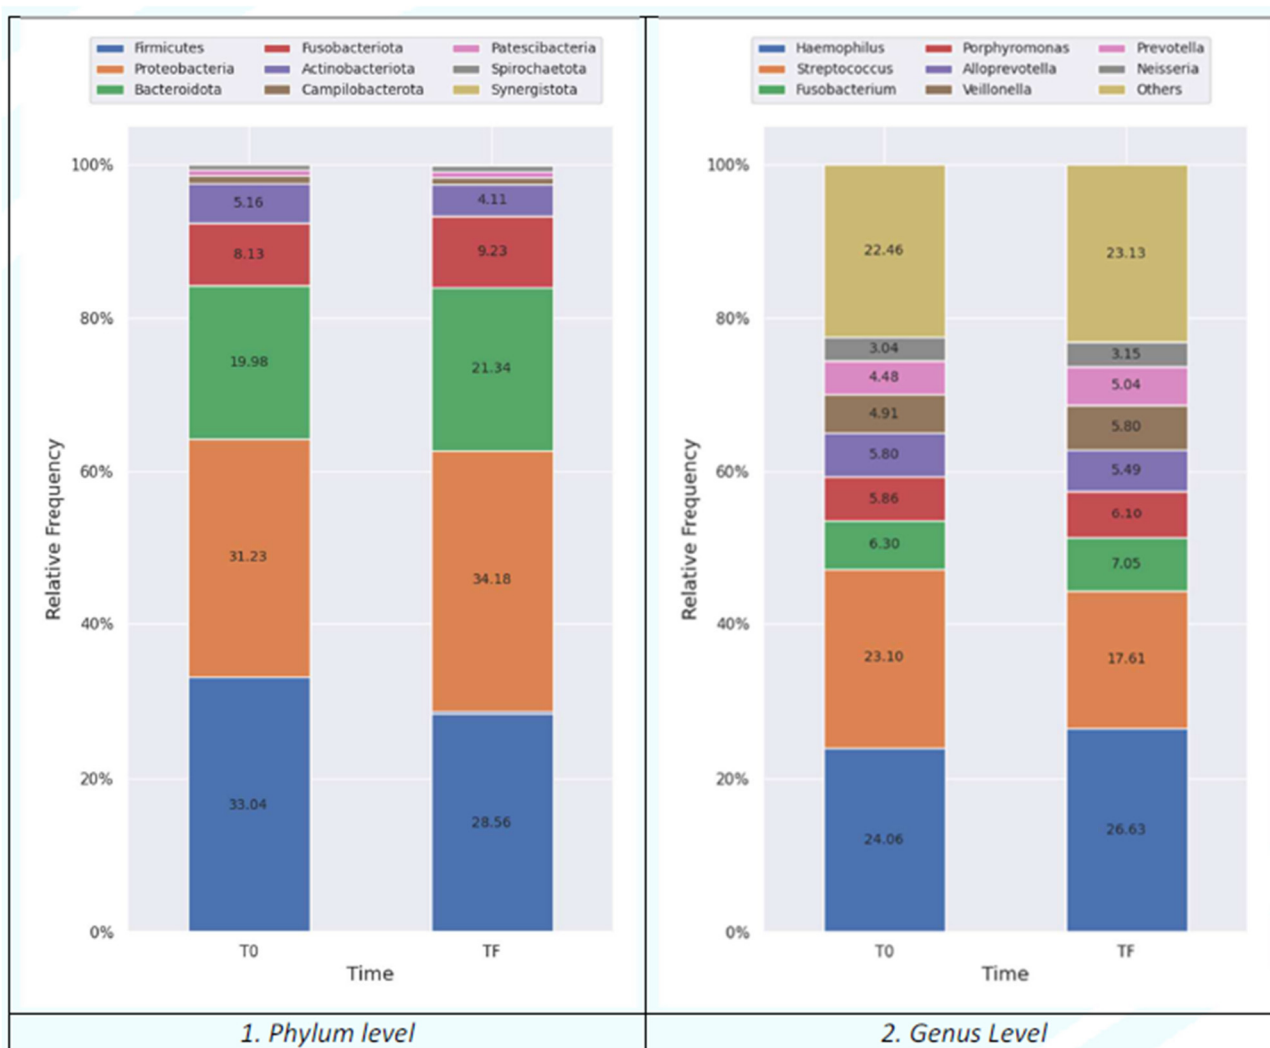

**Figure S2.** Grouped bar plots. Bar plots grouped on Time showing the relative abundance of the most abundant taxa at phylum (1) and genus (2) level. Relative abundance of each taxon is also shown.

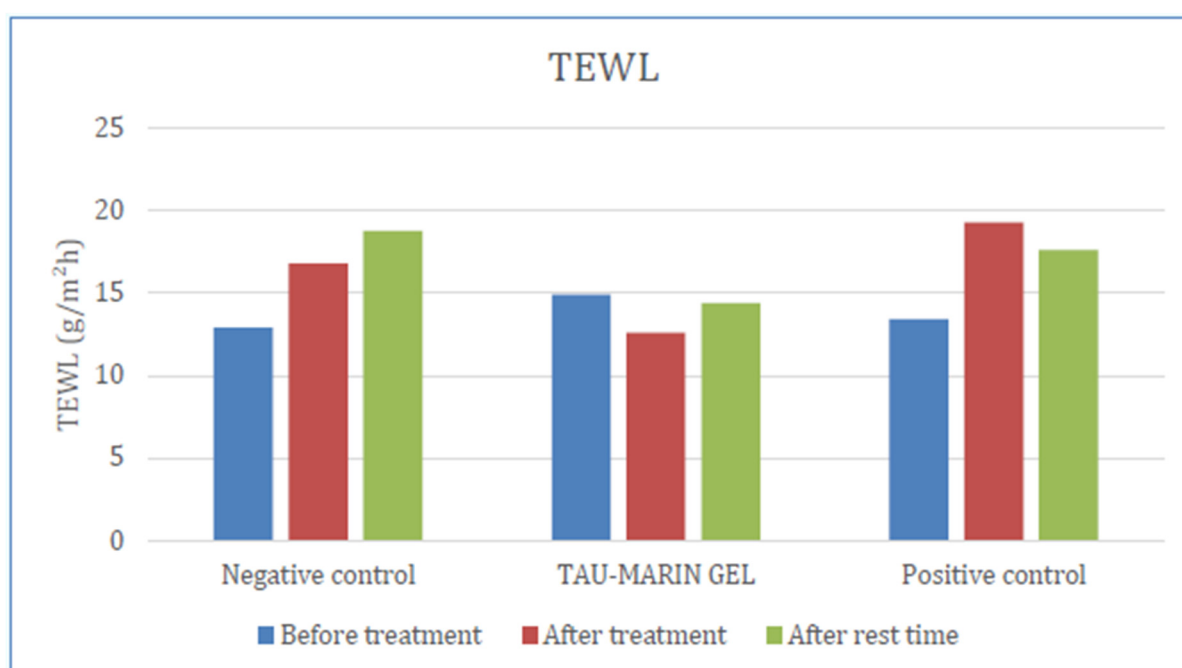

**Figure S3.** TEWL results of Tau-Marin gel versus negative and positive control, evaluated on the mucosal model.
